# Supplementary material for: Structural dimerization and charge-orbital ordering in a ferromagnetic semiconductor LiV2S4 monolayer
Source: Royal Society of Chemistry journal article supplement (doi:10.1039/d3cp04560a), 2023-11-23
Supplement: d3cp04560a1.pdf [file d3cp04560a1.pdf]

**Supplementary materials for**  
**Structural dimerization and charge-orbital ordering in**  
**ferromagnetic semiconductor  $\text{LiV}_2\text{S}_4$  monolayer**

Rui Song,<sup>a</sup> Bili Wang,<sup>a</sup> Kai Feng,<sup>a</sup> Jia Yao,<sup>a</sup> Mengjie Lu,<sup>a</sup> Jing Bai,<sup>a</sup> Shuai Dong<sup>b</sup> and  
Ming An<sup>\*b</sup>

<sup>a</sup> *Department of General Education, Army Engineering University of People's  
Liberation Army, Nanjing 211101, China*

<sup>b</sup> *School of Physics, Southeast University, Nanjing 211189, China*

1. The effect of Hubbard  $U$  on the lattice constants of  $\text{LiVS}_2$  bulk material.

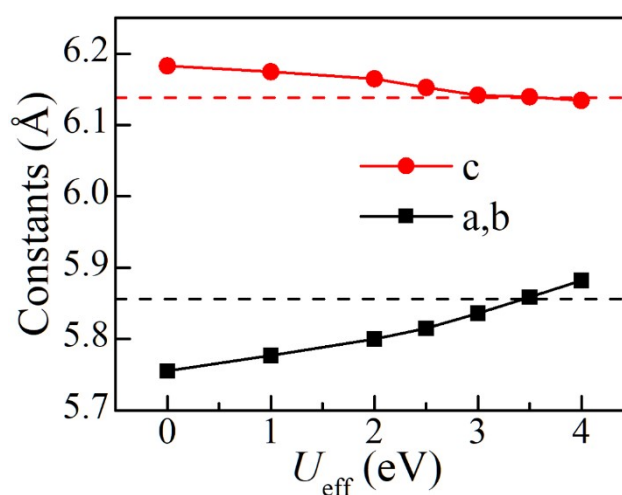

Fig. S1 (a) The diagram of the effective Hubbard  $U$  ( $U_{\text{eff}}$ ) dependent lattice constants. The experimental values are shown by the dashed lines for reference.

2. Phonon modes analysis for the undistorted  $\text{LiV}_2\text{S}_4$  monolayer using  $2 \times 2 \times 1$  supercell.

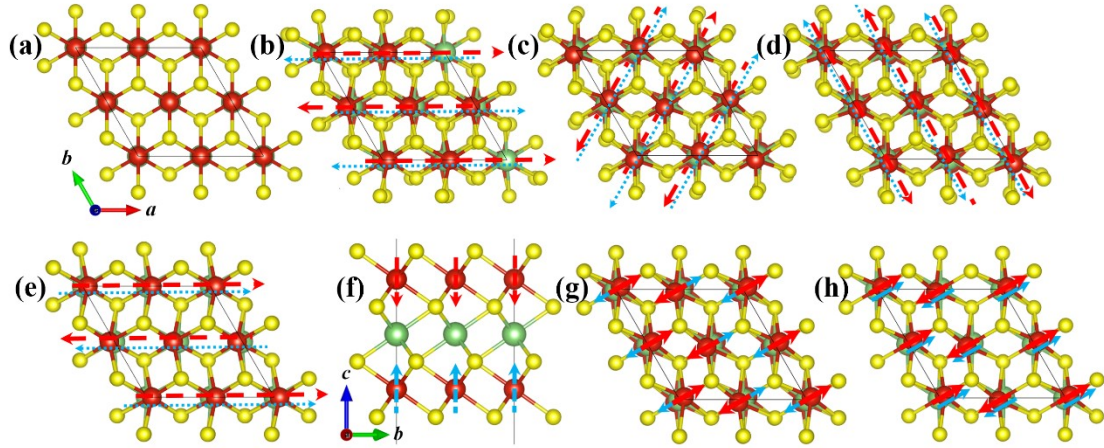

Fig. S2 (a) The undistorted  $\text{LiV}_2\text{S}_4$  with perfect in-plane triangular lattice. Following the eigenvector of those phonon modes with imaginary frequency, several distorted structures have been found, which mainly originate from the relative displacement of V ions. (b-d) The in-plane stripe displacements of V with opposite directions between upper and lower  $\text{VS}_2$  layers. All V ions shift along the stripe direction. In consideration of the rotation symmetry of triangular lattice, the energies for these three distorted structures are degenerate. In other words, these three distortion modes are equivalent. For simplicity, similar equivalent distortions will be ignored thereafter. (e) In-plane stripe displacement, but with same shift direction between upper and lower  $\text{VS}_2$  layers. (f) The relative vertical displacements between upper and lower  $\text{VS}_2$  layers with reverse direction, exhibiting longitudinal compressive behavior. This distortion mode is not observed in the ground state structure. (g, h) The in-plane stripe displacements with shift direction orthogonal to the stripes, and the displacement direction of V ions on adjacent stripes is opposite. The interlayer displacement is reversed in (g) but identical for (h). The relative displacement directions of V ions in the upper and lower  $\text{VS}_2$  layers are represented by red and blue dashed arrows, respectively.

3. The statistical analysis of the Molecular Dynamics (MD) simulation under room temperature (RT, 300 K).

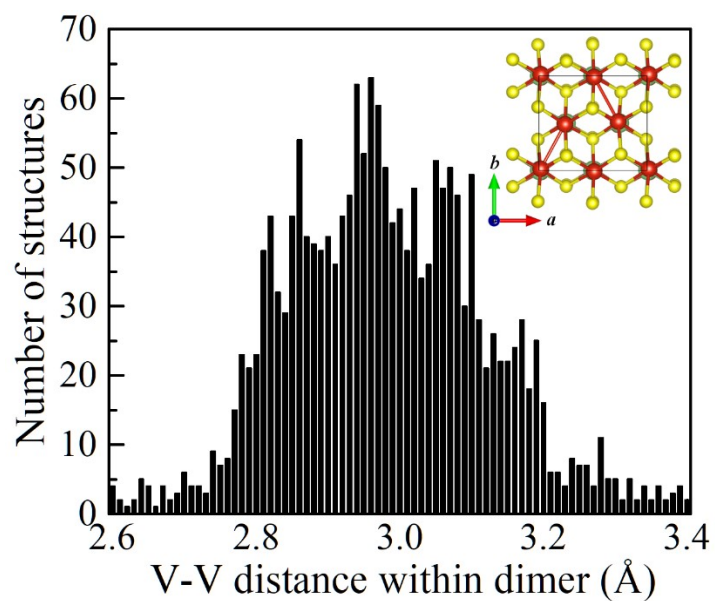

Fig. S3 The statistical results of the V-V distance versus the corresponding number of simulated structures. The V-V distance within the dimer is denoted by red line in the inset.

4. The non-magnetic DOS of  $\text{LiV}_2\text{S}_4$  monolayer in the high symmetric and low-temperature phases.

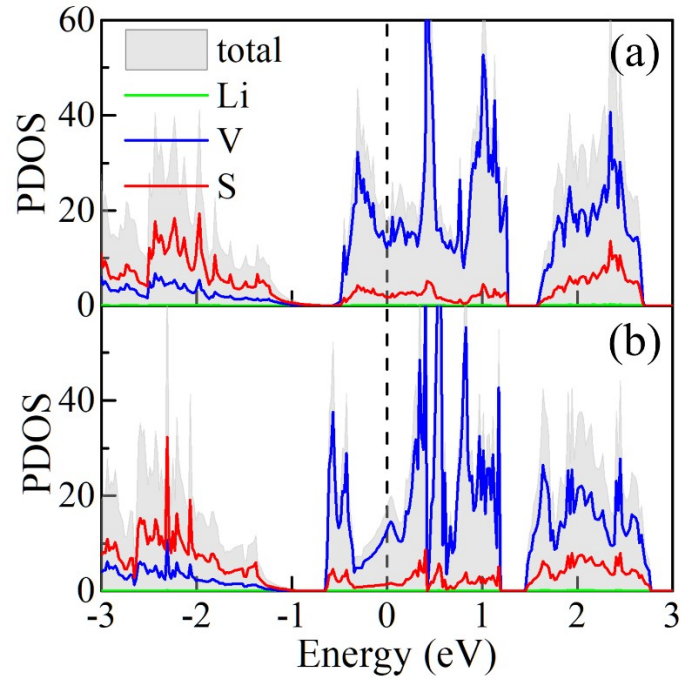

Fig. S4 (a) The atomic projected DOS (PDOS) of high symmetric  $\text{LiV}_2\text{S}_4$  with perfect in-plane triangular lattice ( $P\bar{3}m1$  phase). (b) The PDOS of V dimerized  $\text{LiV}_2\text{S}_4$  monolayer ( $P2/c$  phase). The Fermi level is represented by dashed lines.

5. Table S1. The optimization results of 2D  $\text{LiV}_2\text{S}_4$  with FM and four possible AFM magnetic orders. The in-plane lattice constants ( $a$  and  $b$ ) and the nearest V-V distances ( $s$ : short;  $m$ : medium;  $l$ : long) are in units of Å, and the relative energies are in units of meV/V. The distorted FM ground state is taken as the reference.

| Space group | Order  | Energy | $a$   | $b$   | $s$  | $m$  | $l$  |
|-------------|--------|--------|-------|-------|------|------|------|
| $P-3m1$     | FM     | 90.1   | 7.097 | 5.955 |      |      |      |
|             | A-AFM  | 90.5   | 7.108 | 5.954 | /    | /    | /    |
|             | Stripe | 138.7  | 6.849 | 6.008 |      |      |      |
|             | Zigzag | 899.6  | 6.626 | 5.757 |      |      |      |
| $P2/c$      | FM     | 0.0    | 6.955 | 6.080 | 3.27 | 3.44 | 3.57 |
|             | A-AFM  | 0.3    | 6.955 | 6.080 | 3.26 | 3.43 | 3.57 |
|             | Stripe | 43.6   | 6.960 | 6.028 | 3.27 | 3.43 | 3.53 |
|             | Zigzag | 4.8    | 6.967 | 6.033 | 3.33 | 3.54 | 3.58 |
| $P1$        | Y-AFM  | 22.8   | 6.069 | 5.960 | 3.41 | 3.46 | 3.53 |
